# Supplementary material for: A cost-effective and innovative detector for iron ions
Source: Royal Society of Chemistry journal article supplement (doi:10.1039/d4ra08065c), 2025-01-01
Supplement: d4ra08065c1.pdf [file d4ra08065c1.pdf]

## **Supporting information**

### **A Cost-Effective and Innovative Detector for Iron Ions**

**Yanhui Guo, Jiayi Zhu, Yumei Dai, Long Chen, Weibing Li, Zihang Yuan, Jie Zhou, En Tang\***

**Corresponding addresses: [tangen@mku.edu.cn](mailto:tangen@mku.edu.cn)**

**Minnan Science and Technology University, Fujian, 362000, China**

Due to the relatively large distance of the free water molecules from the primary structure, they were subtracted using a solvent mask for ease of mapping and to simplify the structure. Additionally, 1.1 water molecules were added to the molecular formula. This represents merely an estimate of the number of electrons computed from the solvent masking performed by the software. The molecular formula is  $C_{30}H_{26.2}N_4O_{12.1}Zn_2$ .

**Table. S1 Crystallographic data and structure refinement**

|                         |                             |                                                                 |                |
|-------------------------|-----------------------------|-----------------------------------------------------------------|----------------|
| chemical formula        | $C_{30}H_{24}N_4O_{11}Zn_2$ | $V/nm^3$                                                        | 2991.08(254)   |
| relative molecular mass | 747.27 g/mol                | Z                                                               | 4              |
| Space group             | P 1 21/c 1 (14)             | $\rho /g.cm^{-3}$                                               | 1.659          |
| crystal system          | monoclinic crystal          | absorption coefficient $\mu/mm^{-1}$                            | 1.674          |
| a/ Å                    | 22.1729(9)                  | F(000)                                                          | 1520           |
| b/ Å                    | 8.4424(4)                   | R1, wR values ( $I > 2\sigma(I)$ )                              | 0.0583,0.1836  |
| c/ Å                    | 17.3538(6)                  | R1, wR values (all data)                                        | 0.0840,0.2049  |
| $\alpha/^\circ$         | 90                          | The goodness of fit of F2.                                      | 1.048          |
| $\beta/^\circ$          | 112.96(0)                   | $\theta$ range                                                  | 3.51-29.64     |
| $\gamma/^\circ$         | 90                          | Peak and pore with the maximum difference ( $e \cdot nm^{-3}$ ) | 2.971 , -0.703 |

**Table. S2 Bond lengths [Å] and angles [deg]**

| chemical bond | bond length /nm | chemical bond | bond length /nm |
|---------------|-----------------|---------------|-----------------|
| Zn1—O1        | 2.417(4)        | Zn2—O6        | 2.000(3)        |
| Zn1—N3        | 2.078(4)        | Zn2—N4        | 2.031(4)        |
| Zn1—O2        | 1.994(4)        | Zn2—O1W       | 2.209(4)        |

  

| chemical bond | bond angle /( $^\circ$ ) | chemical bond | bond angle /( $^\circ$ ) |
|---------------|--------------------------|---------------|--------------------------|
| O2—Zn1—N3     | 91.55(16)                | O1—Zn1—C7     | 28.67(16)                |
| O1—Zn1—O2     | 58.11(15)                | O6—Zn2—N4     | 143.51(15)               |
| N3—Zn1—O1     | 149.53(14)               | O6—Zn2—O1W    | 94.11(15)                |
| O2—Zn1—C7     | 29.45(17)                | N4—Zn2—O1W    | 90.31(15)                |
| N3—Zn1—C7     | 120.97(17)               |               |                          |

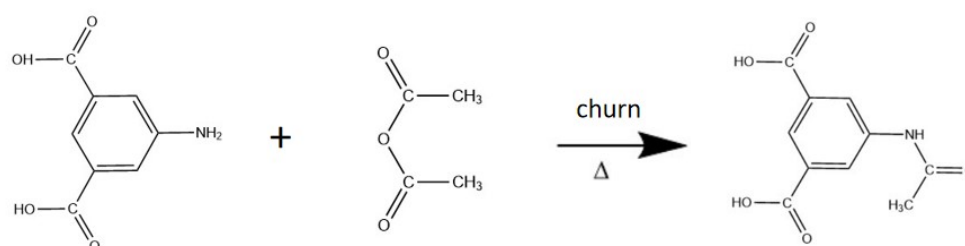

**Fig. S1 Schematic diagram of the synthesis of H<sub>2</sub>APA**

In a 50 mL round bottom flask, 2.00 g of 5-amino-1,3-benzenedicarboxylic acid, 6 mL of acetic

anhydride and 6 drops of concentrated sulphuric acid were added respectively, and after initial mixing by shaking, a magnetic stirrer was added for stirring and the mixture was heated up to 90 °C in a water bath, and the reaction was carried out at 90 °C for 30 min, and then the reaction solution was quickly poured into 20 mL of cold distilled water and stirred to produce a precipitate, which was filtered and dried to give a white Solid (90% yield), that is, 5-acetamido-1,3-benzenedicarboxylic acid ligand (H<sub>2</sub>APA).

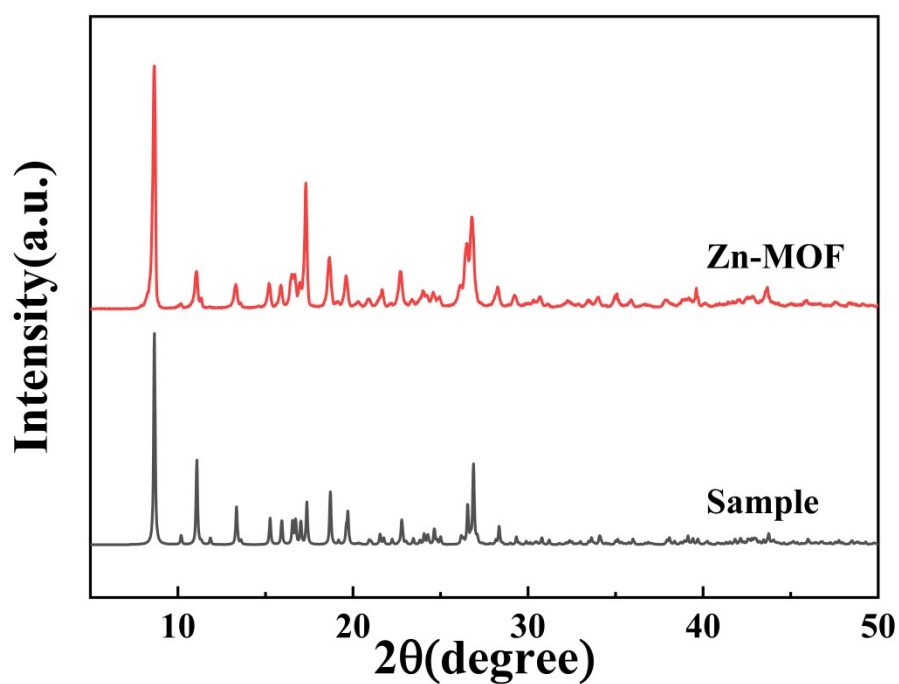

Fig. S2 XRD patterns of Zn-MOFs

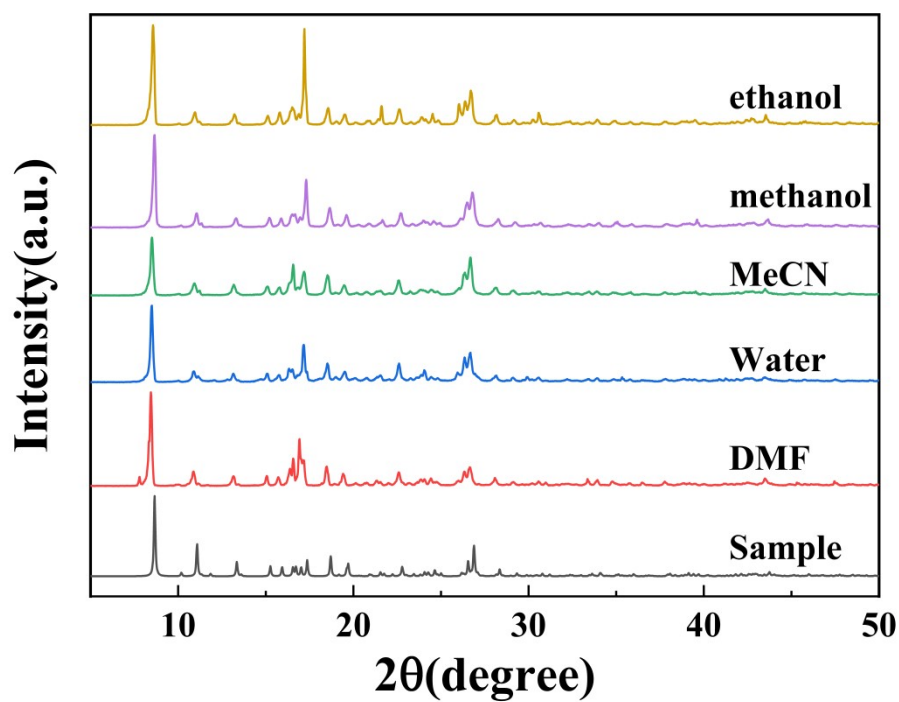

Fig. S3 XRD spectra of Zn-MOFs before and after immersion

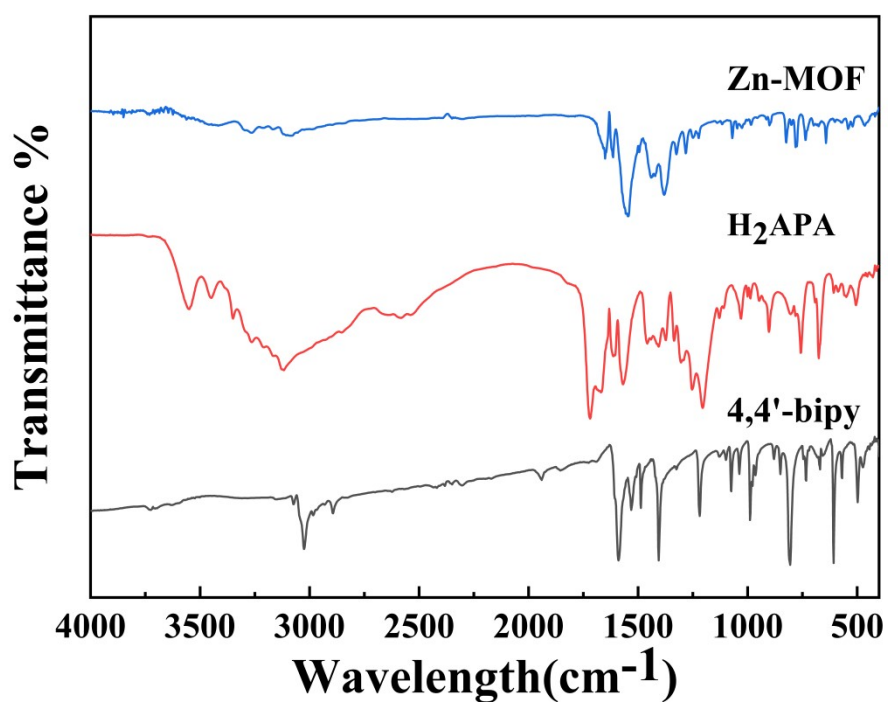

Fig. S4 Infrared spectra of ligands and complexes

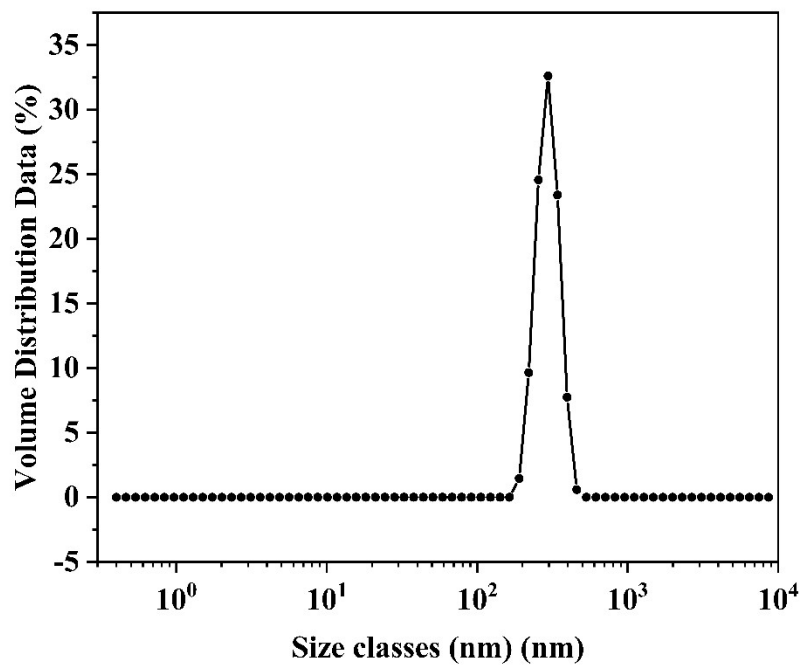

Fig. S5 The particle size distribution diagram in solution

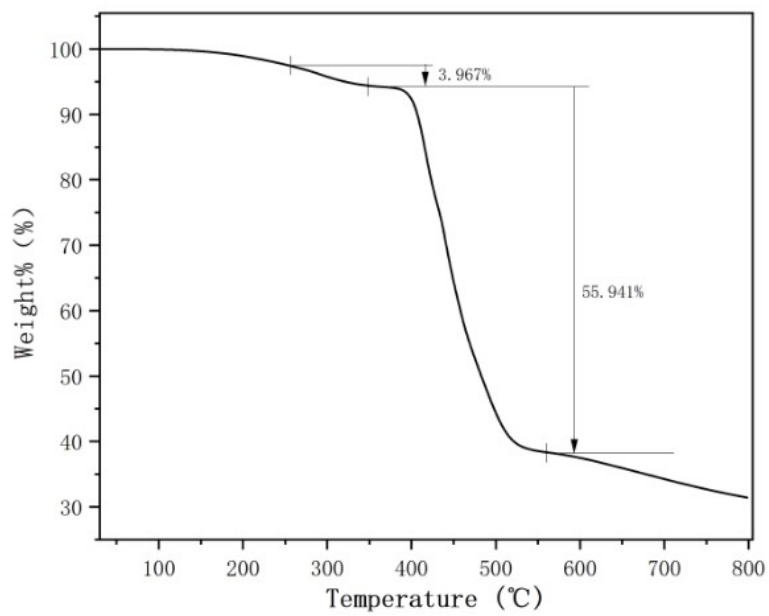

Fig. S6 Thermogravimetric curves of Zn-MOFs

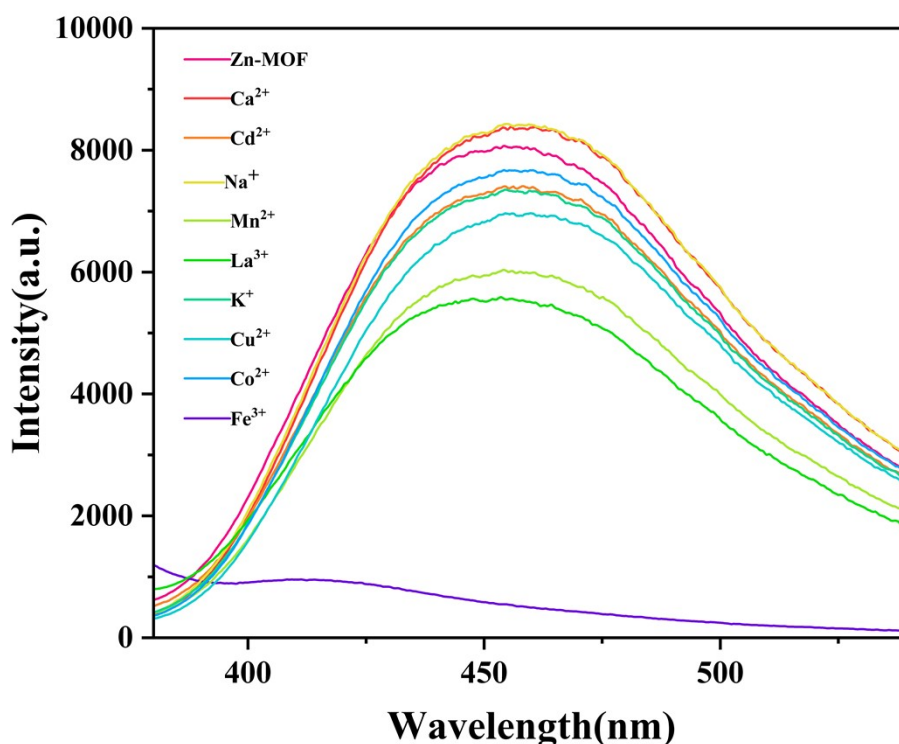

Fig. S7 Fluorescence Emission Spectrum Graph of Metal Ions

Table. S3 Price comparison of some MOFs that can quench Fe<sup>3+</sup>

| CCDC number | sample name                                                                                                        | total price of metal salts/ \$ | total price of organicligands/ \$ | price of organic solvents/ \$ | cost of a 0.1 mmol sample/ \$ |
|-------------|--------------------------------------------------------------------------------------------------------------------|--------------------------------|-----------------------------------|-------------------------------|-------------------------------|
| 2396827     | Zn-MOF                                                                                                             | $5.77 \times 10^{-4}$          | 0.022                             | $7.73 \times 10^{-3}$         | 0.03                          |
| 1573428     | [Eu <sub>2</sub> IJDMTDC) <sub>3</sub> IJDEF) <sub>4</sub> ]·DEF·6H <sub>2</sub> O                                 | 0.085                          | 7.00                              | 0.6750                        | 7.76                          |
| 1573429     | [Tb <sub>2</sub> IJDMTDC) <sub>3</sub> IJDEF) <sub>4</sub> ]·DEF·6H <sub>2</sub> O                                 | 0.208                          | 7.00                              | 0.6750                        | 8.00                          |
| 1521670     | {(Me <sub>2</sub> NH <sub>2</sub> )[Tb(OBA) <sub>2</sub> ](Hatz)(H <sub>2</sub> O) <sub>1.5</sub> ] <sub>n</sub> } | 0.220                          | 0.016                             | 0.0155                        | 0.252                         |
| 1565344     | {[Eu <sub>2</sub> (pdba) <sub>3</sub> (H <sub>2</sub> O) <sub>3</sub> ]·2H <sub>2</sub> O} <sub>n</sub> }          | 0.0485                         | 1.361                             | 0.1156                        | 1.525                         |
| 1565345     | {[Eu <sub>3</sub> (pdba) <sub>4</sub> (H <sub>2</sub> O) <sub>4</sub> ]·5H <sub>2</sub> O} <sub>n</sub> }          | 0.0485                         | 1.362                             | 0.1156                        | 1.526                         |
| 1509860     | 534-MOF-Tb                                                                                                         | 0.0988                         | 5.968                             | 0.8508                        | 6.9176                        |
| 1410772     | [(CH <sub>3</sub> ) <sub>2</sub> NH <sub>2</sub> ]·[Tb(bptc)]·x(solvents)                                          | 0.0274                         | 0.551                             | 0.3911                        | 0.6175                        |
| 1035886     | Eu-BPDA                                                                                                            | 0.0436                         | 0.0384                            | 0.3265                        | 0.4445                        |
| 1965138     | Eu-MOF                                                                                                             | 0.0582                         | 0.0865                            | 0                             | 0.1447                        |
| 1965139     | Tb-MOF                                                                                                             | 0.2169                         | 0.0865                            | 0                             | 0.3034                        |
| 1056662     | UiO-66-NH <sub>2</sub>                                                                                             | 0.5437                         | 0.4686                            | 0.0231                        | 1.035                         |
| 2217760     | {[Ag(L)]ClO <sub>4</sub> ·H <sub>2</sub> O} <sub>n</sub> }                                                         | 0.1842                         | 6.0                               | 0                             | 6.1842                        |

|         |                                                                              |        |        |                        |        |
|---------|------------------------------------------------------------------------------|--------|--------|------------------------|--------|
| 2217761 | $\{\text{[Ag(L)]NO}_3 \cdot \text{H}_2\text{O}\}_n$                          | 0.0617 | 6.0    | 0                      | 6.0617 |
| 2217762 | $\{\text{[Ag(L)]BF}_4 \cdot \text{H}_2\text{O}\}_n$                          | 0.2202 | 6.0    | 0                      | 6.2202 |
| 1916377 | $\{\text{[Cd(5-Brp)(dpa)]} \cdot 0.5\text{DMF} \cdot \text{H}_2\text{O}\}_n$ | 0.0144 | 0.2282 | $2.884 \times 10^{-4}$ | 0.2429 |
| 1916379 | $\text{[Cd(5-Brp)(bpp)(H}_2\text{O)]}_n$                                     | 0.0144 | 0.1818 | $5.047 \times 10^{-4}$ | 0.1967 |
| 2076041 | Tb-MOF                                                                       | 0.1445 | 0.2971 | 0.0232                 | 0.4648 |
| 1905642 | $\text{[Cd}_{0.5}(\text{TBC})]_n$                                            | 0.1442 | 0.3954 | 0.2692                 | 0.6790 |
| 1974695 | Tb-MOF-A                                                                     | 0.2189 | 0.2173 | 0                      | 0.4362 |
| 1846840 | $\text{[Tb}_2(2,3'\text{-oba})_3(\text{phen})_2]_n$                          | 0.2169 | 0.0882 | 0                      | 0.3051 |

Solely the price parameters of chemical reagents are incorporated into consideration. The price details of all chemical reagents can be procured from Aladdin Reagents. In the realm of chemical synthesis, the computational process is predicated on the hypothesis of an ideal reaction, while the expenditure on electricity and water is omitted from the scope of consideration.

**Table. S4 Comparison of LOD Values of Some MOFs that Can quench  $\text{Fe}^{3+}$**

| CCDC number | sample name                                                                                                    | LOD/mol·L <sup>-1</sup> |
|-------------|----------------------------------------------------------------------------------------------------------------|-------------------------|
| 2396827     | Zn-MOF                                                                                                         | $5.619 \times 10^{-6}$  |
| 2354330     | CUST-761                                                                                                       | $2.98 \times 10^{-4}$   |
| 1509860     | 534-MOF-Tb                                                                                                     | $1.3 \times 10^{-4}$    |
| 1410772     | $\text{[(CH}_3)_2\text{NH}_2] \cdot \text{[Tb(bptc)]} \cdot x(\text{solvents})$                                | $1.8 \times 10^{-4}$    |
| 1974695     | Tb-MOF-A                                                                                                       | $1.27 \times 10^{-5}$   |
| 1846840     | $\text{[Tb}_2(2,3'\text{-oba})_3(\text{phen})_2]_n$                                                            | $7.93 \times 10^{-6}$   |
| 2217760     | $\{\text{[Ag(L)]ClO}_4 \cdot \text{H}_2\text{O}\}_n$                                                           | $11.46 \times 10^{-6}$  |
| 2217761     | $\{\text{[Ag(L)]NO}_3 \cdot \text{H}_2\text{O}\}_n$                                                            | $15.83 \times 10^{-6}$  |
| 2217762     | $\{\text{[Ag(L)]BF}_4 \cdot \text{H}_2\text{O}\}_n$                                                            | $15.44 \times 10^{-6}$  |
| 1521670     | $\{(\text{Me}_2\text{NH}_2)[\text{Tb}(\text{OBA})_2](\text{Hatz})(\text{H}_2\text{O})_{1.5}\}_n$               | $10^{-6}$               |
| 2213445     | $\{\text{[Cd(ttc)(H}_2\text{O)]} \cdot \text{H}_2\text{O}\}_n$                                                 | $5.34 \times 10^{-8}$   |
| 1873450     | $\text{[[Tb(Cmdcp)(H}_2\text{O})_3]_2(\text{NO}_3)_2 \cdot 5\text{H}_2\text{O}]_n$                             | $4.0 \times 10^{-6}$    |
| 1899278     | Eu-CP                                                                                                          | $5.0 \times 10^{-7}$    |
| 1818852     | $\text{[Eu}_2\text{L(1,3-bdc)}_3] \cdot 5\text{H}_2\text{O}$                                                   | $2.3 \times 10^{-5}$    |
| 1884067     | $\text{[Eu}_2(\text{ppda})_2(\text{npdc})(\text{H}_2\text{O)]} \cdot \text{H}_2\text{O}$                       | $1.66 \times 10^{-5}$   |
| 1821918     | $\text{[Eu(IMS1)}_2]\text{Cl} \cdot 4\text{H}_2\text{O}$                                                       | $2.3 \times 10^{-5}$    |
| 1035886     | $\text{[[Eu(bpda)}_{1.5}] \cdot \text{H}_2\text{O}]_n$                                                         | $0.9 \times 10^{-6}$    |
| 1538770     | $\{\text{[Zn(ATA)(L)]}\}_n \cdot x\text{H}_2\text{O}$                                                          | $3.76 \times 10^{-6}$   |
| 1538771     | $\{\text{[Cd(ATA)(L)]}\}_n \cdot x\text{H}_2\text{O}$                                                          | $1.77 \times 10^{-6}$   |
| 1542239     | $\{\text{[Zn(DPTMIA)]} \cdot (\text{H}_2\text{O})_2(\text{DMF})_{0.5}\}_n$                                     | $1.09 \times 10^{-3}$   |
| 1840235     | $\{\text{[Cd}_3(\text{HL})_2(\text{H}_2\text{O})_3] \cdot 3\text{H}_2\text{O} \cdot 2\text{CH}_3\text{CN}\}_n$ | $9.06 \times 10^{-5}$   |

Upon examination of the comparison table, it becomes manifestly evident that our Zn-MOF material exhibits a remarkably lower limit of detection (LOD) value with respect to  $\text{Fe}^{3+}$ . When juxtaposed

with the preponderant majority of MOFs, it conspicuously showcases a more preponderant advantage in the domain of LOD. This distinctive characteristic endows it with the capacity to effectuate a more exquisitely sensitive and highly accurate detection of Fe<sup>3+</sup>.

## Notes and references

1. Huang, Y. Q.; Chen, H. Y.; Wang, Y.; Ren, Y. H.; Li, Z. G.; Li, L. C.; Wang, Y., *RSC Adv.*, **2018**, *8*, 21444–21450. DOI: 10.1039/c8ra02809e
2. Wang, J.; Wang, J. R.; Li, Y.; Jiang, M.; Zhang, L.; Wu, P., *New J. Chem.*, **2016**, *40*, 8600. DOI: 10.1039/c6nj02163h
3. Parmar, B.; Rachuri, Y.; Bisht, K. K.; Suresh, E., *Inorg. Chem.*, **2017**, *56*, 10939–10949. DOI: 10.1021/acs.inorgchem.7b01130
4. Li, H.; He, Y.; Li, Q.; Shao, S.; Yi, Z.; Xu, Z.; Wang, Y., *RSC Adv.*, **2017**, *7*, 50035. DOI: 10.1039/c7ra08427g
5. Yu, H. H.; Chi, J. Q.; Su, Z. M.; Li, X.; Sun, J.; Zhou, C.; Hu, X. L.; Li, Q., *CrystEngComm*, **2020**, *22*, 3638. DOI: 10.1039/d0ce00430h
6. Zhao, K. Y.; Zhai, X.; Shao, L.; Li, L.; Liu, Y. L.; Zhang, L. M.; Fu, Y., *J. Mater. Chem. C.*, **2021**, *9*, 15840. DOI: 10.1039/d1tc04311k
7. Wu, M. Z.; Shi, J. Y.; Chen, P. Y.; Tian, L., *New J. Chem.*, **2019**, *43*, 10575. DOI: 10.1039/c9nj02214g
8. Zhu, S. Y.; Yan, B., *Dalton Trans.*, **2018**, *47*, 11586. DOI: 10.1039/c8dt02051e
9. Jia, L.; Xue, Z.; Zhu, R. R.; Yan, T.; Wang, Y. N.; Zhang, S. S.; Du, L. X.; Zhao, Q. H., *RSC Adv.*, **2019**, *9*, 39854. DOI: 10.1039/c9ra07559c
10. Wu, J. M.; Ma, S. X.; Kumar, S.; Yang, Y.; Ren, P. T., *ACS Appl. Mater. Interfaces*, **2023**, *15*, 17317–17323. DOI: 10.1021/acsami.2c22871
11. Huang, Y. Q.; Chen, H. Y.; Wang, Y.; Ren, Y. H.; Li, Z. G.; Li, L. C.; Wang, Y., *RSC Adv.*, **2018**, *8*, 21444–21450. DOI: 10.1039/c8ra02809e



12. Wang, J.; Wang, J. R.; Li, Y.; Jiang, M.; Zhang, L.; Wu, P., *New J. Chem.*, **2016**, *40*, 8600. DOI: 10.1039/c6nj02163h
13. Parmar, B.; Rachuri, Y.; Bisht, K. K.; Suresh, E., *Inorg. Chem.*, **2017**, *56*, 10939–10949. DOI: 10.1021/acs.inorgchem.7b01130
14. Li, H.; He, Y.; Li, Q.; Shao, S.; Yi, Z.; Xu, Z.; Wang, Y., *RSC Adv.*, **2017**, *7*, 50035. DOI: 10.1039/c7ra08427g
15. Yu, H. H.; Chi, J. Q.; Su, Z. M.; Li, X.; Sun, J.; Zhou, C.; Hu, X. L.; Li, Q., *CrystEngComm*, **2020**, *22*, 3638. DOI: 10.1039/d0ce00430h
16. Zhao, Y. M.; Zhai, X.; Shao, L.; Li, L.; Liu, Y. L.; Zhang, X. M.; Fu, Y., *J. Mater. Chem. C.*, **2021**, *9*, 15840. DOI: 10.1039/d1tc04311k
17. Wu, M. Z.; Shi, J. Y.; Chen, P. Y.; Tian, L., *New J. Chem.*, **2019**, *43*, 10575. DOI: 10.1039/c9nj02214g
18. Zhu, S. Y.; Yan, B., *Dalton Trans.*, **2018**, *47*, 11586. DOI: 10.1039/c8dt02051e
19. Jia, L.; Xue, Z.; Zhu, R. R.; Yan, T.; Wang, Y. N.; Zhang, S. S.; Du, L. X.; Zhao, Q. H., *RSC Adv.*, **2019**, *9*, 39854. DOI: 10.1039/c9ra07559c
20. Mohan, B.; Ma, S. X.; Kumar, S.; Yang, Y.; Ren, P. T., *ACS Appl. Mater. Interfaces*, **2023**, *15*, 17317–17323. DOI: 10.1021/acsami.2c22871
